# Supplementary material
Source: PubMed Central journal article supplement (PMC2670134)
Supplement: M900580200_1.pdf [file M900580200_1.pdf]

### Supplementary Table I

#### cysteine-to-serine mutation

|         |               |                                                   |
|---------|---------------|---------------------------------------------------|
| C1S     | G161C         | ccctatgaacaacatgaat <u>cc</u> attttccaaataaagcc   |
| C2S     | G224C         | gttcaggggattatct <u>ct</u> aatgccaacaacccc        |
| C3S     | G242C         | gccaacaaccct <u>ct</u> ttccgttacccg               |
| C4S     | G584C         | gacaagtctgt <u>cc</u> aatggatcaaaatc              |
| C5S     | G644C         | gtttctgagcttt <u>ct</u> ggcctaccaaggg             |
| C6S     | G926C         | cgtattgtct <u>cc</u> gggcatcccagagg               |
| C7S     | G1064C        | tctacaactccttact <u>cc</u> aatgattgatgaag         |
| C8S     | G1511C        | cgcttcattggagt <u>ct</u> gtcaacctgaacaagc         |
| C9S     | G1877C        | gcctateccct <u>ct</u> tacgttgatgac                |
| C10S    | G2372C        | ctttgggtttggct <u>ct</u> gagtactttgcc             |
| C11S    | G4253C        | tcgggaccgct <u>ct</u> atggaaggaaaccc              |
| C12S    | G4286C        | gacacgcct <u>cc</u> caggcaggggagg                 |
| C13S    | G4388C        | ccctcacctgcat <u>cc</u> cagtgtagcagc              |
| C14S    | G4394C        | cctgcatgccagt <u>ct</u> tagcagcgacaaaatc          |
| C15S    | G4430C        | gctgcctgtgt <u>ct</u> ccccaggggcagg               |
| C16S    | G5441C        | ctccacatttt <u>cc</u> ctgggacgag                  |
| C13/14S | G4388C/G4394C | cctgcat <u>cc</u> cagt <u>ct</u> tagcagcgacaaaatc |

#### serine-to-cysteine reverse mutation

|      |        |                                                 |
|------|--------|-------------------------------------------------|
| S1C  | C161G  | ccctatgaacaacatgaat <u>cc</u> attttccaaataaagcc |
| S2C  | C224G  | gttcaggggattatct <u>gt</u> aatgccaacaacccc      |
| S6C  | C926G  | cgtattgtct <u>cc</u> gggcatcccagagg             |
| S11C | C4253G | tcgggaccgct <u>gt</u> atggaaggaaaccc            |
| S12C | C4286G | gacacgcct <u>cc</u> caggcaggggagg               |
| S13C | C4388G | ccctcacctgcat <u>cc</u> cagtgtagcagc            |
| S14C | C4394G | cctgcatgccagt <u>gt</u> tagcagcgacaaaatc        |
| S15C | C4430G | gctgcctgtgt <u>ct</u> ccccaggggcagg             |

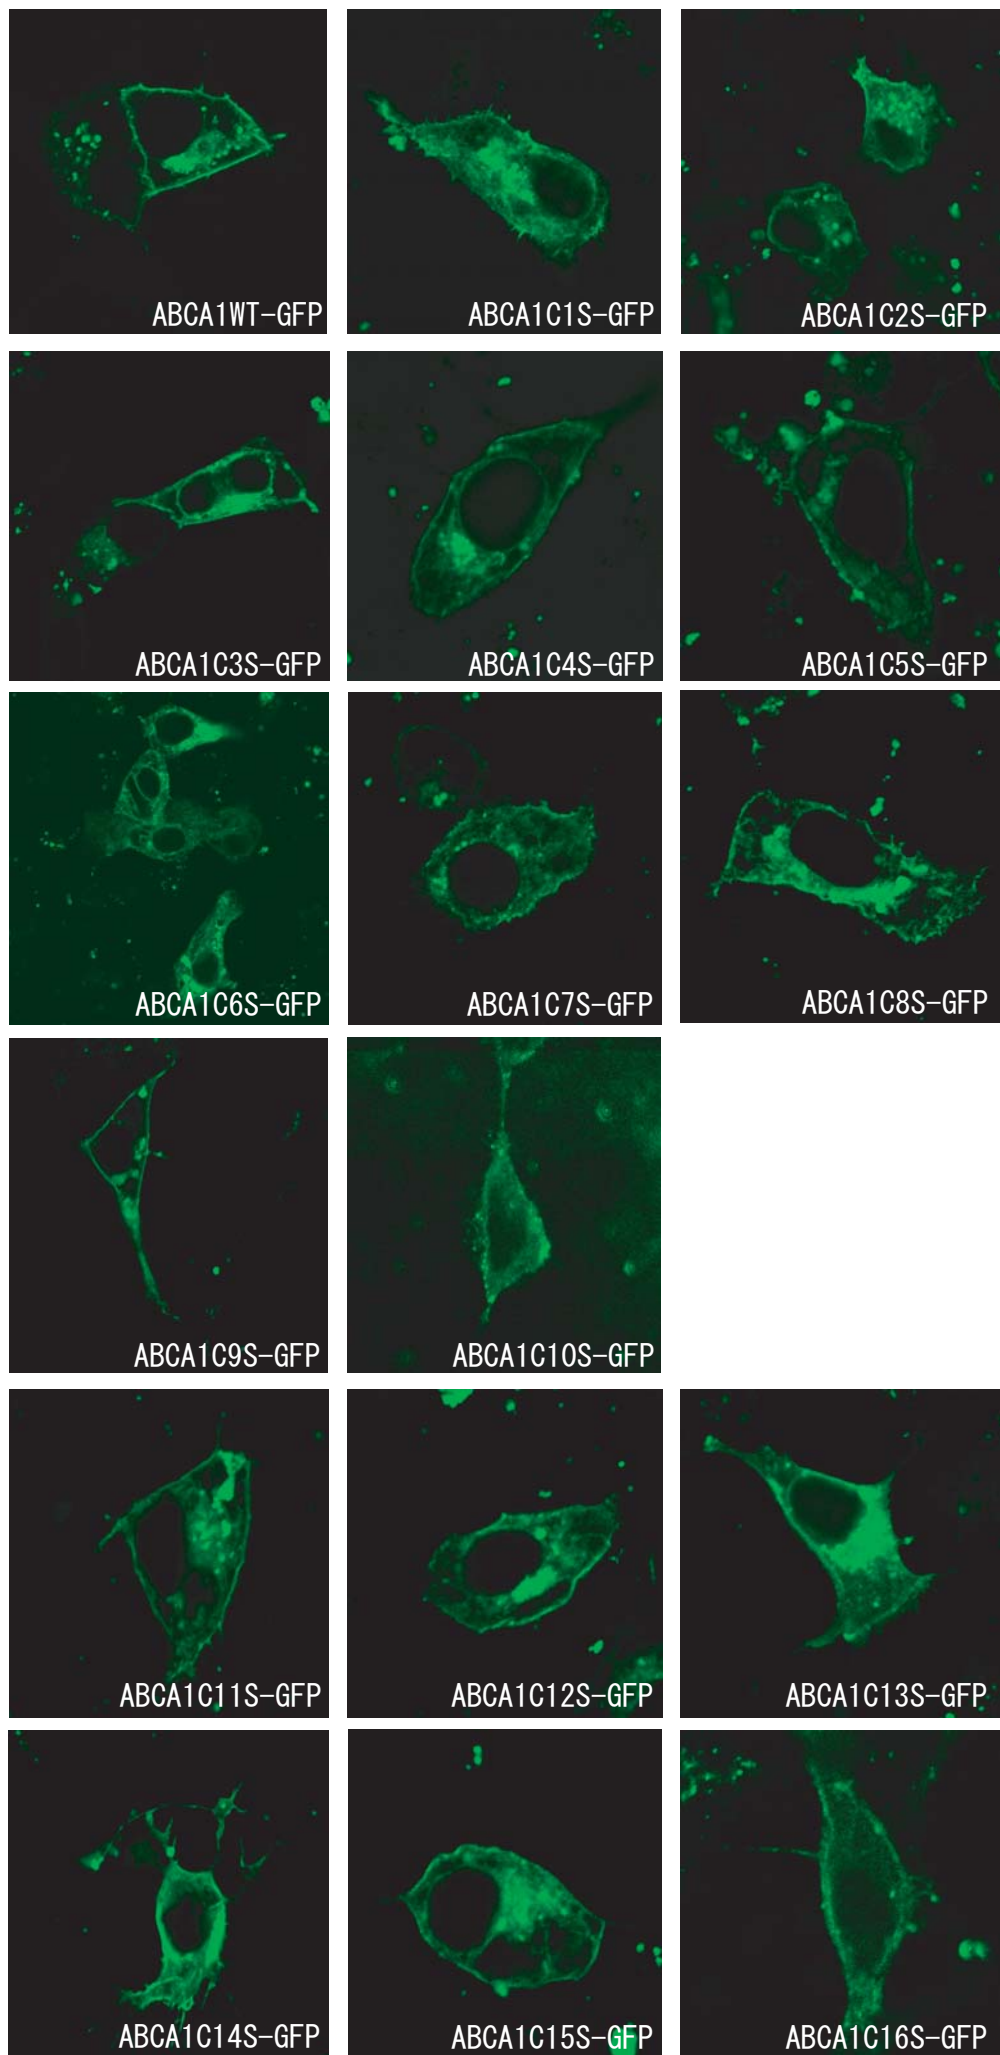

Supplementary figure 1 Hozoji, M. et al.

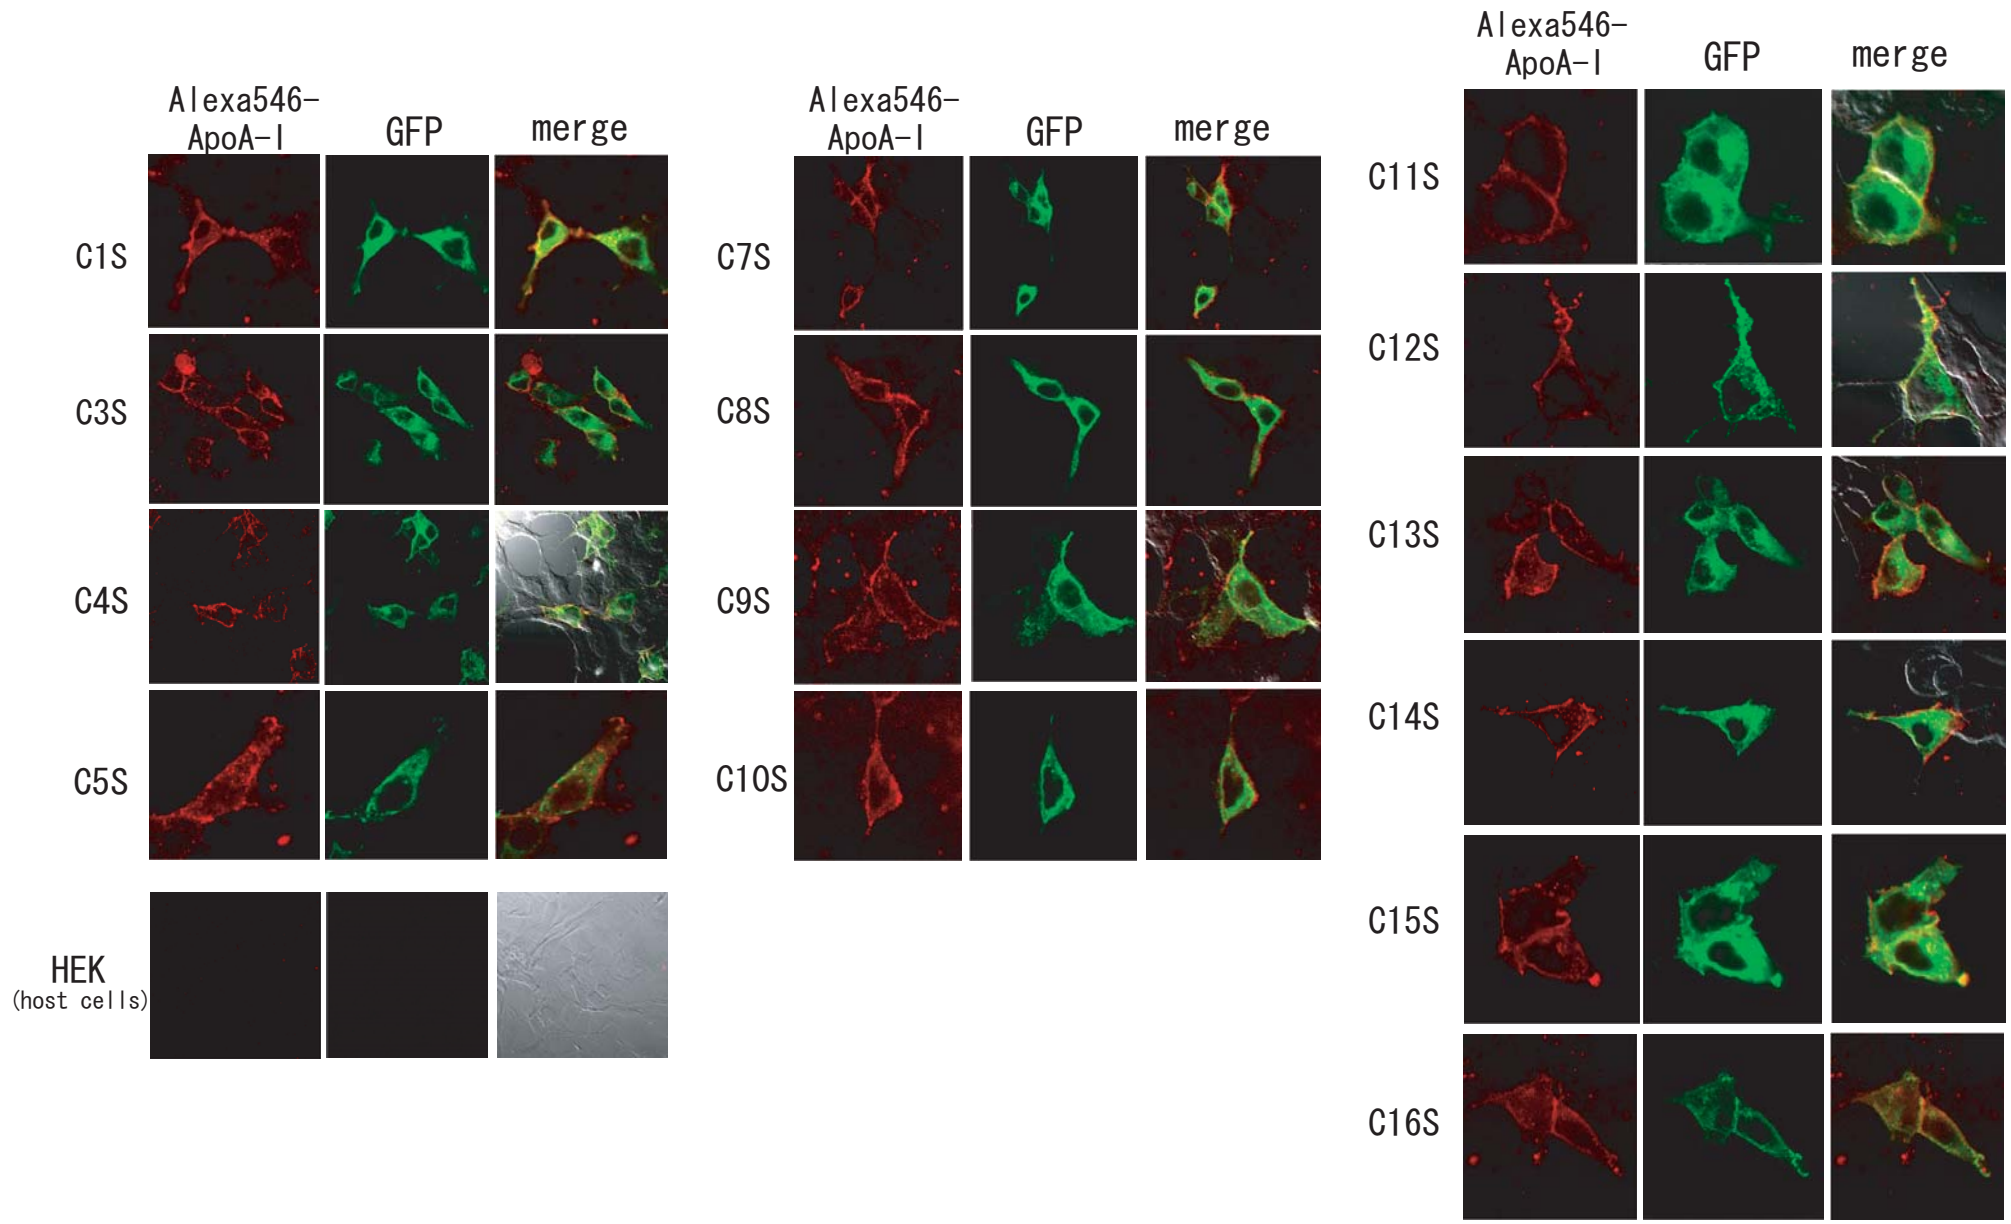

Supplementary figure 2 Hozoji, M. et al.

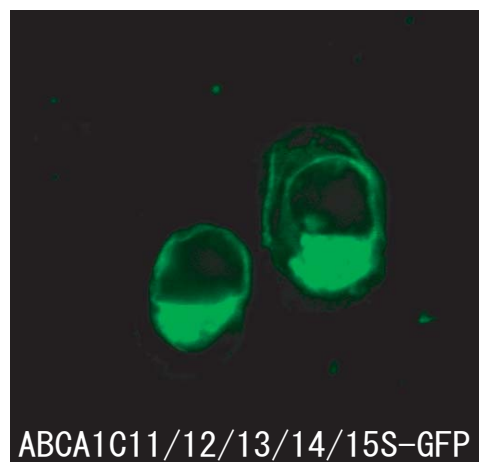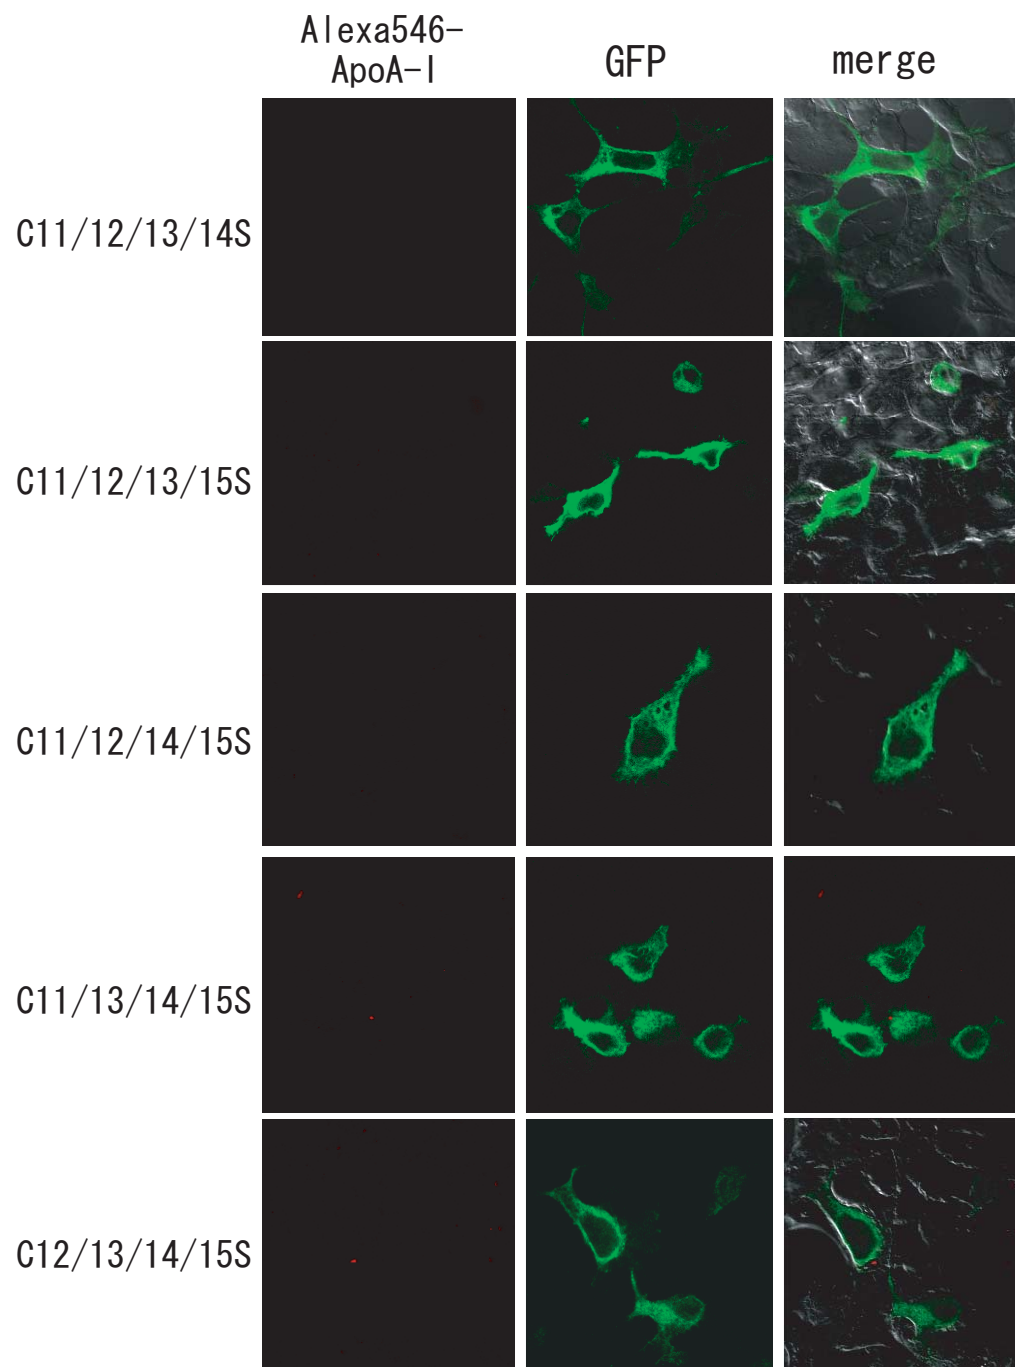

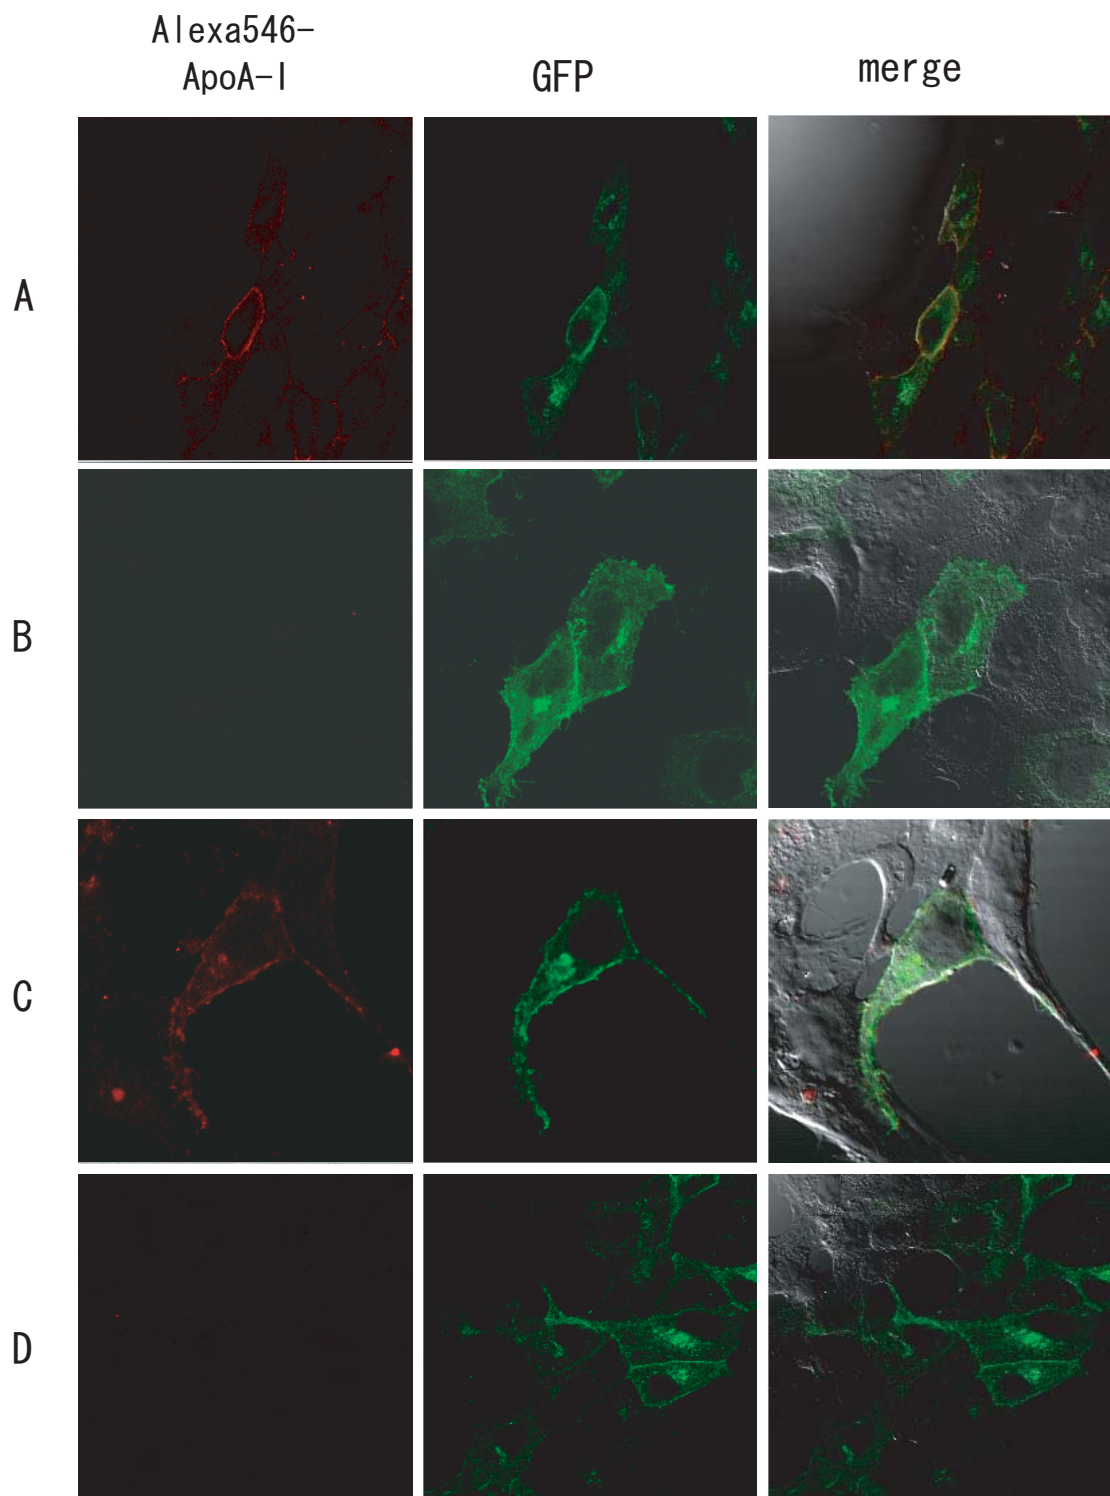

Supplementary figure 4 Hozoji, M. et al.

**A**

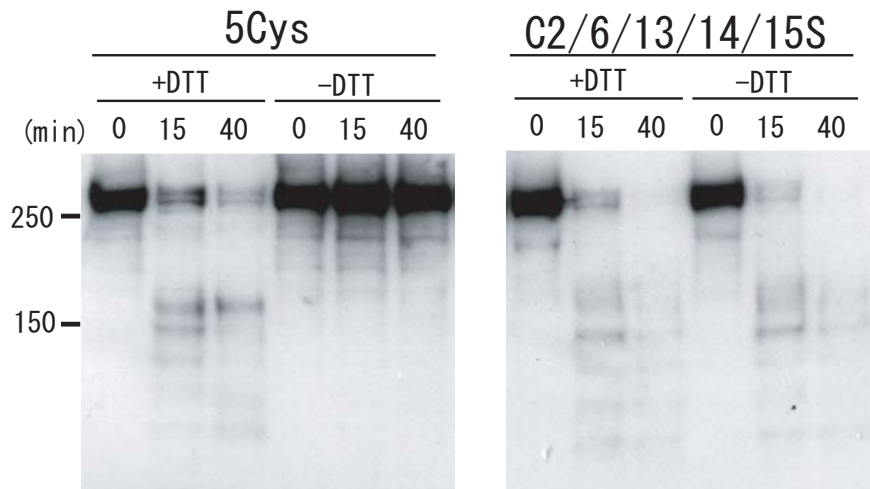

**B**

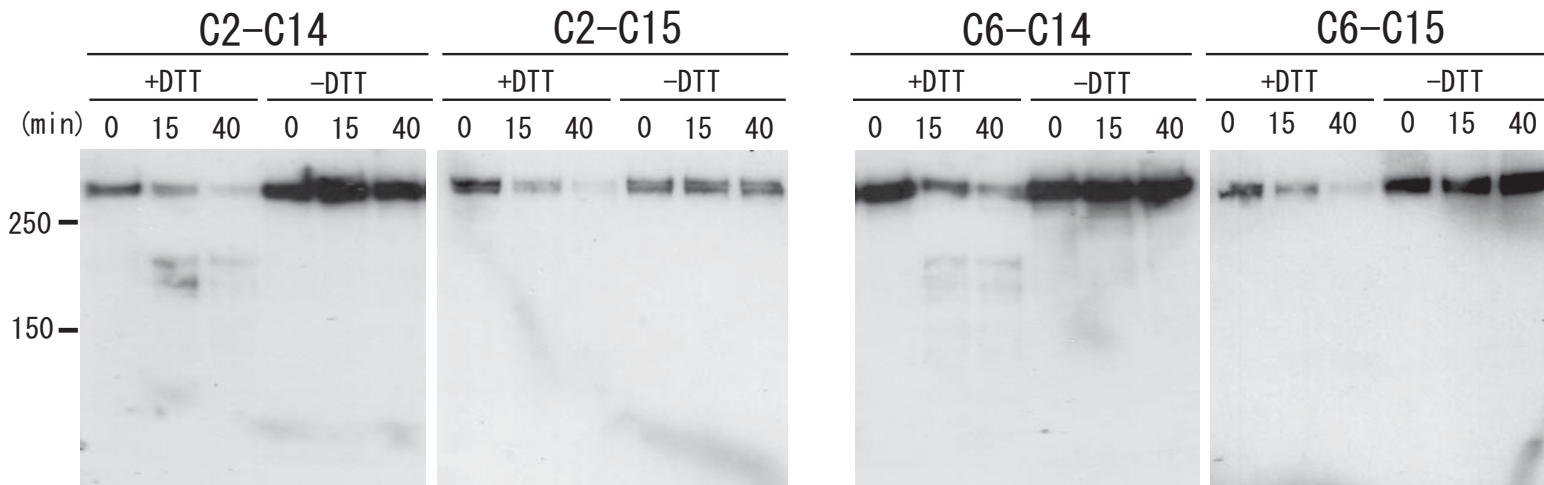

Supplementary figure 5 Hozoji, M. et al.
